# Supplementary material
Source: publisher figshare collection journal article supplement (https://tandf.figshare.com/ndownloader/files/12977450)
Supplement: Supplementary file 1 [file 12977450]

**Supplemental Table 1: The ICD9 and CPT codes used within this study**

| **Diagnosis Codes** | **ICD-9 Codes** |
| --- | --- |
| Primary Open Angle Glaucoma | 365.00, 365.01, 365.04, 365.05, 365.10-.12, 365.15 |
| Diabetes Mellitus | 250.xx |
| **Procedure Codes** | **CPT-4 Codes** |
| Glaucoma laser and surgical codes | 65820, 65850, 65855, 66150, 66150, 66160, 66165, 66170, 66172, 66180, 66185, 66625, 66630, 66700, 66710, 66711, 66720, 66740 |
| Humphrey Visual Field codes | 92081, 92082, 92083 |
